# Supplementary material for: Cellulose nanofibers (CNFs) in the recycling of nickel and cadmium battery metals using electrodeposition
Source: Royal Society of Chemistry journal article supplement (doi:10.1039/d3na00401e), 2023-01-01
Supplement: d3na00401e1.pdf [file d3na00401e1.pdf]

## Cellulose Nanofibers (CNFs) in the Recycling of Nickel and Cadmium Battery Metals using Electrodeposition

B. W. Hoogendoorn<sup>a</sup>, O. Karlsson<sup>a</sup>, X. Xiao<sup>a</sup>, A. Pandey<sup>a</sup>, S. E. Mattsson<sup>b</sup>, V. Ström<sup>c</sup>, R. A. Andersson<sup>a</sup>, Y. Li<sup>a</sup> and R. T. Olsson<sup>a</sup>

---

<sup>a</sup> Department of Fibre and Polymer Technology, School of Engineering Sciences in Chemistry, Biotechnology and Health, KTH Royal Institute of Technology, SE-100 44 Stockholm, Sweden. E-mail: [rols@kth.se](mailto:rols@kth.se);

<sup>b</sup> SAFT AB, Jungnergatan 25, 572 32 Oskarshamn, Sweden.

<sup>c</sup> Department of Material Science and Engineering, School of Industrial Engineering and Management, KTH Royal Institute of Technology, Brinellvägen 23, SE-100 24. Stockholm, Sweden.

**Table S1:** Composition of the electrolytes used during the electrodeposition of nickel and/or cadmium\*

| Sample** | Electrolyte types                      | C(Ni <sup>2+</sup> ) [M] | C(Cd <sup>2+</sup> ) [M] | C(a-CNF) [g/L] | C(q-CNF) [g/L] |
|----------|----------------------------------------|--------------------------|--------------------------|----------------|----------------|
| 1        | Ni-deposition single-metal reference   | 0.44                     | 0                        | 0              | 0              |
| 2        | Ni-deposition single-metal a-CNF       | 0.44                     | 0                        | 0.5            | 0              |
| 3        | Ni-deposition single-metal q-CNF       | 0.44                     | 0                        | 0              | 0.5            |
| 4        | Cd-deposition single-metal reference   | 0                        | 0.44                     | 0              | 0              |
| 5        | Cd-deposition single-metal a-CNF       | 0                        | 0.44                     | 0.5            | 0              |
| 6        | Cd-deposition single-metal q-CNF       | 0                        | 0.44                     | 0              | 0.5            |
| 7        | Ni/Cd-deposition mixed-metal reference | 0.22                     | 0.22                     | 0              | 0              |
| 8        | Ni/Cd-deposition mixed-metal reference | 0.40                     | 0.04                     | 0              | 0              |
| 9        | Ni/Cd-deposition mixed-metal reference | 0.33                     | 0.11                     | 0              | 0              |
| 10       | Ni/Cd-deposition mixed-metal reference | 0.11                     | 0.33                     | 0              | 0              |
| 11       | Ni/Cd-deposition mixed-metal reference | 0.04                     | 0.40                     | 0              | 0              |
| 12       | Ni/Cd-deposition mixed-metal a-CNF     | 0.22                     | 0.22                     | 0.5            | 0              |
| 13       | Ni/Cd-deposition mixed-metal a-CNF     | 0.40                     | 0.04                     | 0.5            | 0              |
| 14       | Ni/Cd-deposition mixed-metal a-CNF     | 0.33                     | 0.11                     | 0.5            | 0              |
| 15       | Ni/Cd-deposition mixed-metal a-CNF     | 0.11                     | 0.33                     | 0.5            | 0              |
| 16       | Ni/Cd-deposition mixed-metal a-CNF     | 0.04                     | 0.40                     | 0.5            | 0              |
| 17       | Ni/Cd-deposition mixed-metal q-CNF     | 0.22                     | 0.22                     | 0              | 0.5            |

\*All reactions were performed at potentiostatic conditions at 3.5 V, 40 °C, and for 10 min.

\*\* The electrolyte volume and electrolyte concentration for Na<sub>2</sub>SO<sub>4</sub>, and H<sub>3</sub>BO<sub>3</sub> were identical in all electrolytes (0.5 L, 12 g/L and 40 g/L, respectively).

---

**Table S2:** Crystallite size of the nickel and cadmium deposits as determined from the three peaks with the highest intensity.\*

---

| Sample | Electrolyte types       | Peak 1 | Peak 2 | average |
|--------|-------------------------|--------|--------|---------|
| 1      | Ni-deposition reference | 21     | 15     | 18±4    |
| 2      | Cd-deposition reference | 65     | 56     | 60±6    |

\*For Ni-deposition, the peak 1 and 2 are the ones corresponding to the (111)-, and the (200)-planes, and for the Cd-deposits, these corresponds to the (002)-, and the (101)-planes.

---

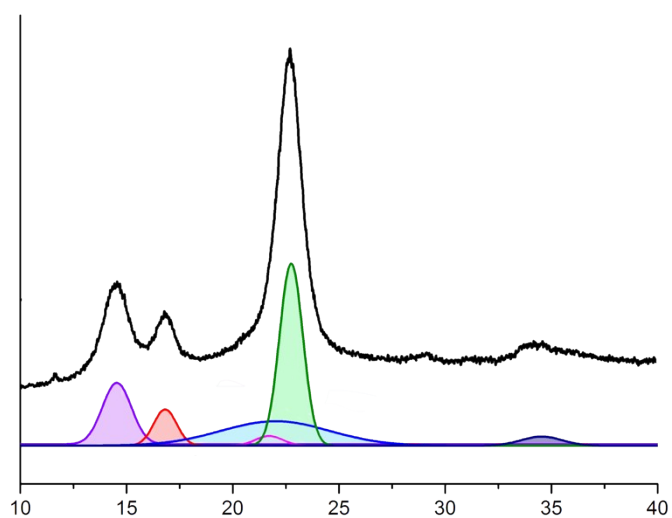

**Fig S1.** X-ray diffractogram of the untreated bacterial cellulose and the deconvoluted peaks corresponding to the crystalline peaks corresponding to the (101)- (violet), ( $10\bar{1}$ )- (red), (021) (purple), and (002)- (green) and (040)-plane (dark blue). The blue curve at ca. 21° corresponds to the amorphous contribution obtained through gaussian curve fitting.

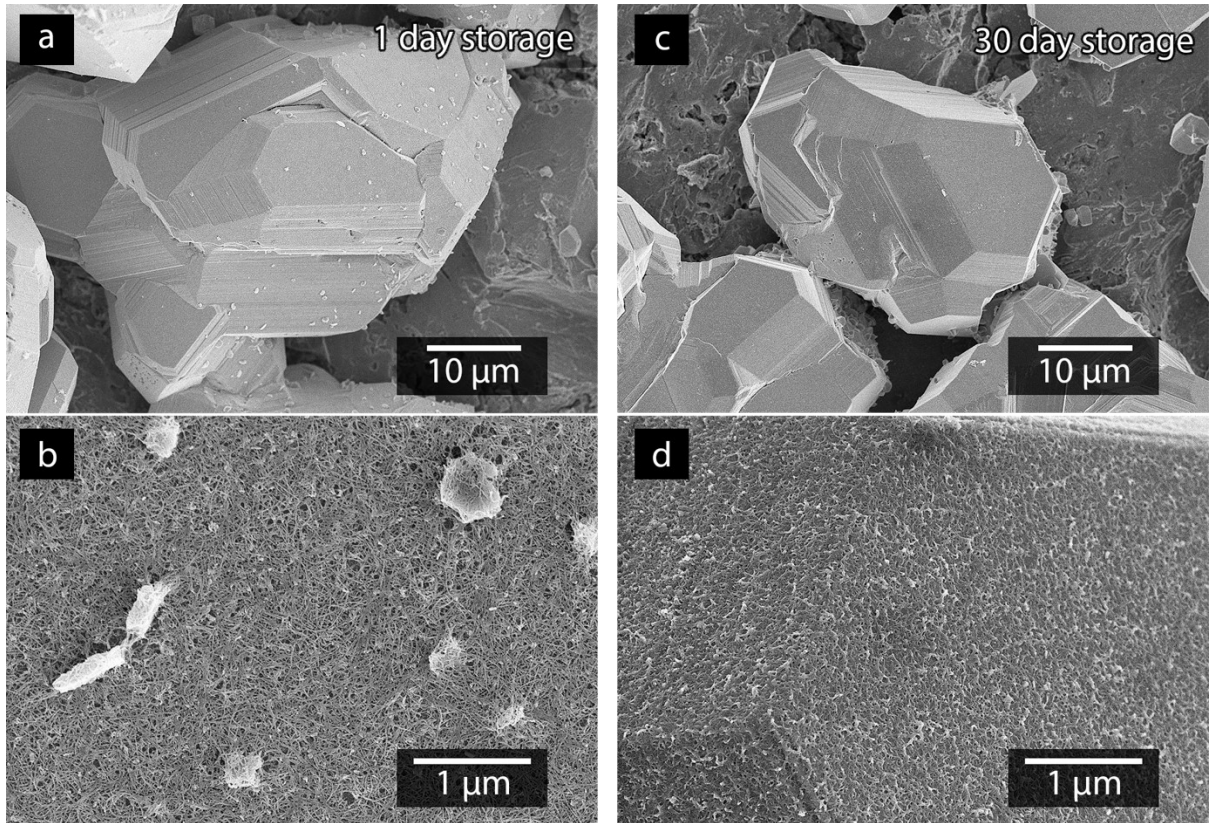

**Fig S2.** SEM-micrographs of cadmium deposits one day after electrodeposition (a and b) and 30 days months after electrodeposition (c and d).

**a**

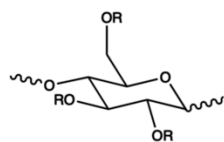

R= H or SO<sub>3</sub><sup>⊖</sup>

**b**

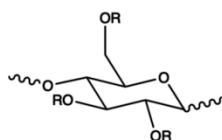

R= H, SO<sub>3</sub><sup>⊖</sup> or 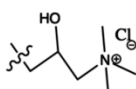

**Fig. S3.** Molecular structure of the repeating unit of cellulose after acid hydrolysis (a) and quaternization (b).

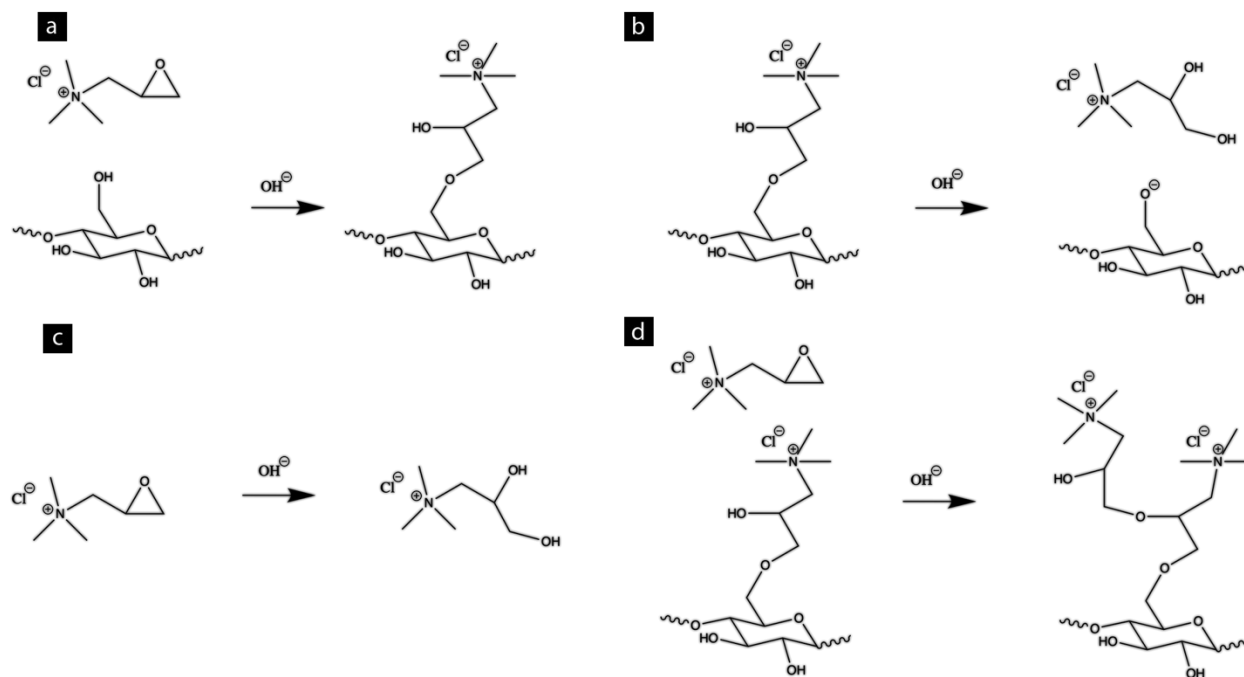

**Fig. S4.** Reaction mechanisms for the reactions previously suggested to occur in an aqueous, alkaline medium, including the direct quaternization of cellulose on the hydroxyl group attached to the C<sub>6</sub>-atom (a), the degradation of the quaternized cellulose (b), the hydrolysis of the GTMAC-precursor (c), and the repeated substitution occurring on an already quaternized C<sub>6</sub>-hydroxyl group. the presence of sulfate half esters has not been taken into account in this schematic.

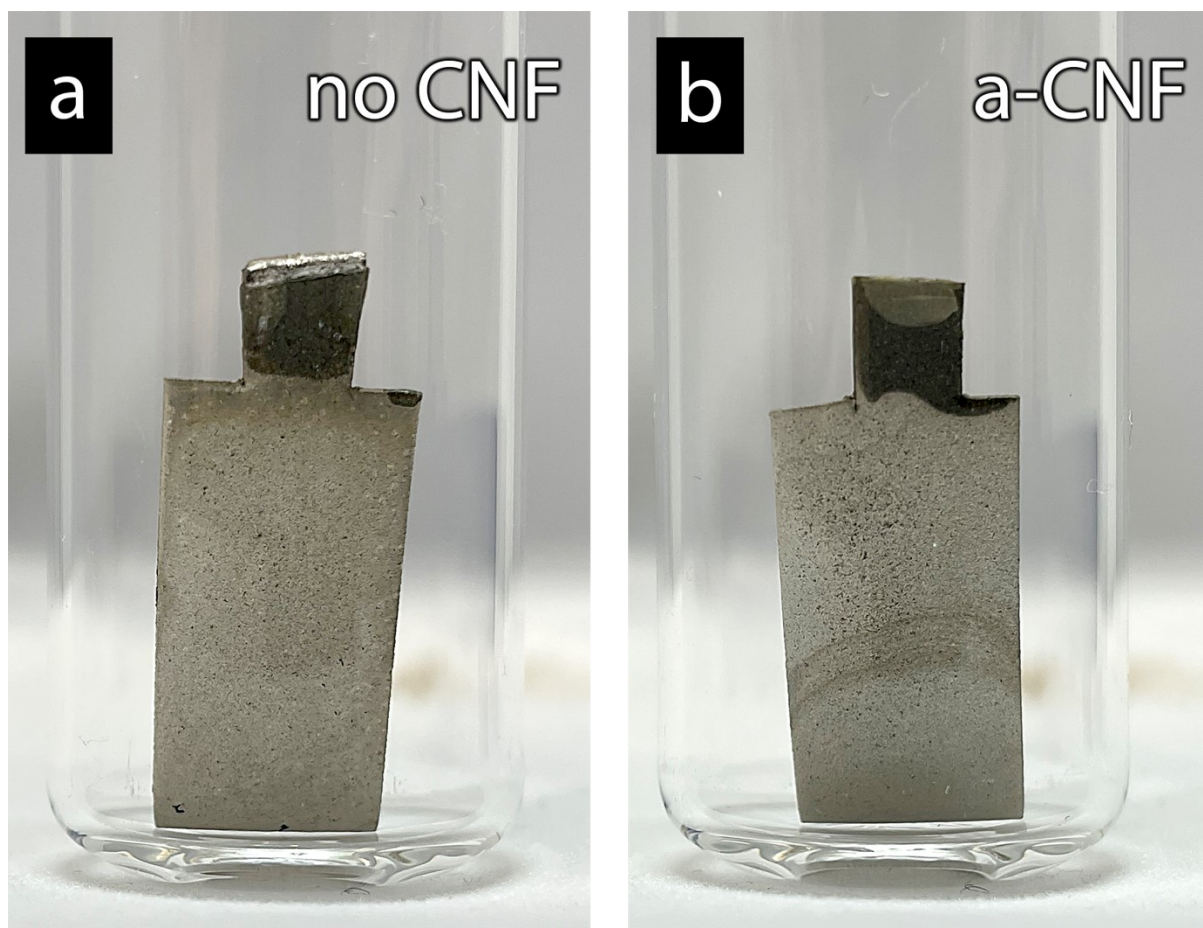

**Fig. S5.** Photographs of the active area of electrodes that had been deposited with nickel without the presence of CNF (a) and in the presence of 0.5 g/L of a-CNF (b).



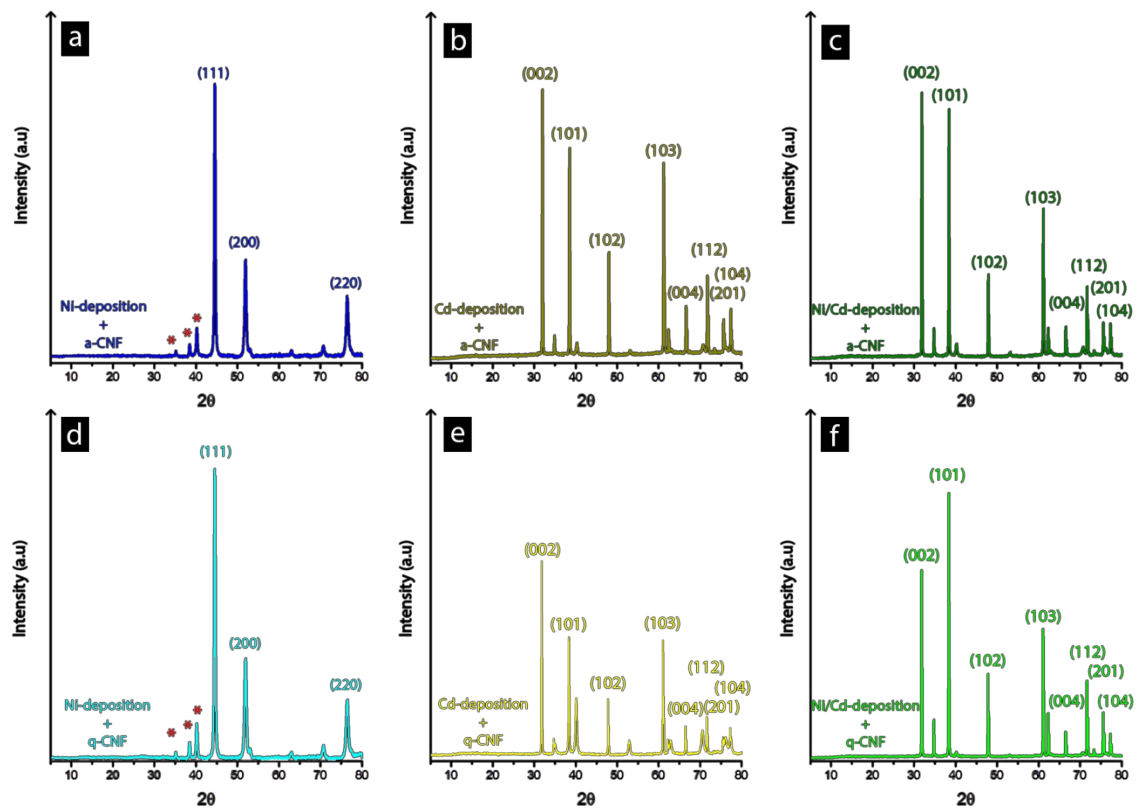

**Fig. S6.** X-ray diffractogram of Ti-electrodes after 10 min of electrodeposition in electrolytes containing 0.5 g/L of *a*-CNF (a-c) or *q*-CNF (d-f). The electrodeposition protocols were performed in electrolytes containing 0.44 moles/L of Ni-ions (a and f), Cd-ions (b and e) or 0.22 moles/L of Ni- and Cd-ions (c and f). The red dots mark the peaks originating from the Ti-electrode.
